# Supplementary material
Source: HighWire-hosted journal article supplement (https://erj.ersjournals.com/content/59/5/2101500)
Supplement: inline-supplementary-material-1 [file inline-supplementary-material-1.pdf]

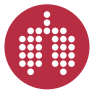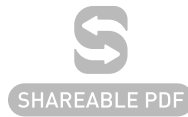

# *Pseudomonas aeruginosa* membrane vesicles cause endothelial barrier failure and lung injury

Mark J. McVey<sup>1,2,3,4</sup>, Mazharul Maishan<sup>1</sup>, Anna Foley<sup>5</sup>, Razan Turki<sup>1,5</sup>, Elyse J. Roach<sup>6</sup>, Rose Deschler<sup>7</sup>, Sarah Weidenfeld<sup>7</sup>, Neil M. Goldenberg<sup>2,3,5</sup>, Cezar M. Khursigara <sup>6</sup> and Wolfgang M. Kuebler<sup>1,5,7,8</sup>

<sup>1</sup>Keenan Research Centre for Biomedical Science, St. Michael's Hospital, Toronto, ON, Canada. <sup>2</sup>Depts of Anesthesiology and Pain Medicine and Physiology, University of Toronto, Toronto, ON, Canada. <sup>3</sup>Dept of Anesthesia and Pain Medicine, Hospital for Sick Children, Toronto, ON, Canada. <sup>4</sup>Dept of Physics, Ryerson University, Toronto, ON, Canada. <sup>5</sup>Dept of Physiology, University of Toronto, Toronto, ON, Canada. <sup>6</sup>Dept of Molecular and Cellular Biology, Guelph University, Guelph, ON, Canada. <sup>7</sup>Institute of Physiology, Charité-Universitätsmedizin, Berlin, Germany. <sup>8</sup>Dept of Surgery, University of Toronto, Toronto, ON, Canada.

Corresponding author: Wolfgang M. Kuebler ([wolfgang.kuebler@charite.de](mailto:wolfgang.kuebler@charite.de))

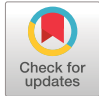

Shareable abstract (@ERSpublications)

Membrane vesicles released by *Pseudomonas aeruginosa* PA14 can elicit septic acute lung injury due to loss of endothelial barrier integrity and inflammasome activation <https://bit.ly/3gMnkPu>

**Cite this article as:** McVey MJ, Maishan M, Foley A, et al. *Pseudomonas aeruginosa* membrane vesicles cause endothelial barrier failure and lung injury. *Eur Respir J* 2022; 59: 2101500 [DOI: 10.1183/13993003.01500-2021].

This single-page version can be shared freely online.

Copyright ©The authors 2022. For reproduction rights and permissions contact [permissions@ersnet.org](mailto:permissions@ersnet.org)

Received: 26 May 2021  
Accepted: 4 Feb 2022

*To the Editor:*

Sepsis is a common cause of lung hyperinflammation and barrier failure, resulting in acute respiratory distress syndrome (ARDS). Despite antibiotics, mortality from bacterial sepsis increases in the developed world, suggesting injurious mechanisms beyond live bacteria. In addition to bacterial toxins, membrane vesicles (MVs) may present potential mechanisms of organ failure in sepsis. Bacterial MVs are extracellular vesicles formed from bacterial membranes [1] that can elicit systemic inflammatory responses, e.g. by inflammasome activation [2, 3]. Here, we tested whether MVs from a relevant sepsis pathogen, *Pseudomonas aeruginosa*, were sufficient to cause characteristic signs of acute lung injury (ALI), the preclinical analogue to ARDS, *in vitro* and *in vivo*.
